# Supplementary material for: Re-assessing the diversity of negative strand RNA viruses in insects
Source: PLoS Pathog. 2019 Dec 12;15(12):e1008224. doi: 10.1371/journal.ppat.1008224 (PMC6932829; doi:10.1371/journal.ppat.1008224)
Supplement: S3 Table — Twenty combinations of non-Hexapoda phylum/class were found across all 1243 assemblies. Matches were required to be of at least 500 nucleotides, with at least a 98% nucleotide identity level. (XLSX) [file ppat.1008224.s004.xlsx]

## Sheet: S3_Table
Phylum	Class
Annelida	Clitellata
Annelida	Polychaeta
Arthropoda	Arachnida
Arthropoda	Branchiopoda
Arthropoda	Chilopoda
Arthropoda	Diplopoda
Arthropoda	Hexanauplia
Arthropoda	Malacostraca
Arthropoda	Ostracoda
Ascomycota	Dothideomycetes
Ascomycota	Eurotiomycetes
Ascomycota	Saccharomycetes
Chordata	Actinopteri
Chordata	Aves
Chordata	Mammalia
Echinodermata	Echinoidea
Mollusca	Bivalvia
Mollusca	Gastropoda
Platyhelminthes	Rhabditophora
Rotifera	Monogononta
